# Supplementary material for: Does Radiofrequency Ablation Induce Neoplastic Changes in Benign Thyroid Nodules: A Preliminary Study
Source: PubMed Central journal article supplement — Endocrinol Metab (Seoul). 2019 May 15;34(2):169–78. doi: 10.3803/EnM.2019.34.2.169 (PMC6599903; doi:10.3803/enm.2019.34.2.169), 2019-05-15
Supplement: enm-34-169-s002.pdf [file enm-34-169-s002.pdf]

**Supplemental Table S2.** Sixteen Benign Thyroid Nodules Treated with RFA and Pathologic Results<sup>a</sup>

| Case           | Pathology | Sex | Age, yr | No. of RFA session | Complication | Time interval, mo |
|----------------|-----------|-----|---------|--------------------|--------------|-------------------|
| 1              | Benign    | F   | 33      | 2                  | No           | 78.7              |
| 2              | Benign    | F   | 63      | 2                  | No           | 35.8              |
| 3              | Benign    | F   | 47      | 3                  | No           | 80.6              |
| 4 <sup>b</sup> | Benign    | F   | 37      | 2                  | Hematoma     | 1.0               |
| 5              | Benign    | F   | 43      | 2                  | Hematoma     | 22.0              |
| 6              | Benign    | F   | 41      | 1                  | No           | 31.3              |
| 7              | Benign    | F   | 18      | 1                  | No           | 30.3              |
| 8              | Benign    | F   | 38      | 1                  | Hoarseness   | 26.2              |
| 9              | Benign    | F   | 33      | 1                  | Hematoma     | 12.3              |
| 10             | Benign    | F   | 39      | 1                  | No           | 55.9              |
| 11             | Benign    | F   | 47      | 2                  | No           | 37.5              |
| 12             | Benign    | F   | 39      | 4                  | No           | 36.8              |
| 13             | Benign    | F   | 59      | 1                  | No           | 29.0              |
| 14             | Benign    | F   | 41      | 1                  | No           | 25.0              |
| 15             | Benign    | M   | 63      | 1                  | No           | 32.8              |
| 16             | Benign    | F   | 59      | 1                  | No           | 64.5              |

RFA, radiofrequency ablation.

<sup>a</sup>Time interval: from initial RFA to biopsy; <sup>b</sup>Ethanol ablation.
